1 **Response of whitefly to the wild tomato *Solanum***

2 ***habrochaites***

3 Fengqi Li<sup>1,\*</sup>, Youssef Dewer<sup>2</sup>, Jiahui Tian<sup>1</sup>, Du Li<sup>1</sup>, Cheng Qu<sup>1</sup>, Zhen

4 Yang<sup>3</sup> & Chen Luo<sup>1</sup>

5

6 <sup>1</sup> Beijing Key Laboratory of Environment Friendly Management on Fruit Diseases and  
7 Pests in North China, Institute of Plant and Environment Protection, Beijing Academy  
8 of Agriculture and Forestry Sciences, Beijing 100097, China

9

10 <sup>2</sup>Bioassay Research Department, Central Agricultural Pesticide Laboratory,  
11 Agricultural Research Center, Dokki, Giza 12618, Egypt; [dewer72@yahoo.com](mailto:dewer72@yahoo.com)

12

13 <sup>3</sup>Tianjin University of Traditional Chinese Medicine, Tianjin 300000, China

14 \* Correspondence: [pandit@163.com](mailto:pandit@163.com)

15 **Abstract**

16 The whitefly *Bemisia tabaci* (Gennadius) causes severe damage to cultivated tomato  
17 in many regions of the world through direct feeding and indirectly through  
18 transmission of plant viruses. Field observations show that *B. tabaci* is rarely infested  
19 the non-host plants such as the wild tomato *Solanum habrochaites*; however, the  
20 molecular mechanism involved in the recognition of wild plant odors is still unclear.  
21 In this study, we assessed the effects of *S. habrochaites* on the survival, fecundity, and  
22 egg hatchability of the Mediterranean (MED) species of *B. tabaci*. Expression and  
23 splicing of stress-response genes in whitefly exposed to *S. habrochaites* was analyzed  
24 using RNA-sequencing data and alternative splicing analysis. These results indicated  
25 that the *S. habrochaites* treatment can induce the expression of environmental stress  
26 genes in *B. tabaci*. This study may help us to a better understanding of the molecular

27 mechanisms involved in the olfactory recognition of non-host volatiles particularly  
28 wild tomato relative. Furthermore, the findings of this study may provide excellent  
29 chances of finding a suitable antagonist of eco-friendly properties which can block the  
30 perception of chemosensory signals. Thereby, the feeding behavior and food  
31 preferences of *B. tabaci* can be manipulated and thus insect populations can  
32 eventually be controlled.

33 **Keywords:** whitefly, *Solanum habrochaites*, transcriptome

## 34 **1. Introduction**

35 The Whitefly *Bemisia tabaci* (Gennadius) is one of the most important pests that  
36 causes economic damage to crop plants (De et al., 1997). *B. tabaci* has a high  
37 oviposition rate and rapid population growth (Erdogan et al., 2008). The Middle  
38 East-Asia Minor1 (MEAM1) and Mediterranean (MED) subspecies are the most  
39 invasive *B. tabaci* whiteflies worldwide (Chu et al., 2006). In China, the MED cryptic  
40 species has now been replaced by MEAM1 in many regions (Hu et al., 2011).

41 *B. tabaci* is one of the main tomato pests that reduces tomato growth through direct  
42 feeding and indirectly through transmission tomato yellow leaf curl virus (TYLCV)  
43 (Su et al., 2016). *B. tabaci* is the only vector of TYLCV, so whitefly control is one of  
44 the key measures used to manage TYLCV (Wei et al., 2017). Chemical insecticides  
45 remain the main tools in the management of whitefly, but the rapid development of  
46 resistance to several chemical classes of insecticides has made it so difficult to control  
47 (Elbert et al., 2000). Therefore, there are urgent demands for safe alternative strategies  
48 in modern pest management, i.e. for controlling whitefly populations. One of these

49 novel approaches is based on the fact that chemical communication via the olfactory  
50 system drives essential behaviors of insects (Ingham et al., 2020). Indeed, detecting  
51 appropriate chemical signals is essential for insects to find their mating partners,  
52 oviposition sites and food sources (Pelosi et al., 2017; Leal and Walter, 2013).  
53 Accordingly, the olfactory system of many insects has evolved to chemo-detectors of  
54 high sensitivity and accuracy, which allow the insect to detect plant volatile odors at  
55 extremely low concentrations and to discriminate a large variety of odor cues (Suh et  
56 al., 2014) . Thus, understanding of the mechanisms and signals that are involved in  
57 non-host selection behavior of *B. tabaci* may lead to strategies that exploit the  
58 odorous alert signals to enhance crop resistance.

59 *B. tabaci* is attracted to cultivated tomato, but it is repelled by the wild tomato  
60 relative *S. habrochaites*. The repellent behavior response of *B. tabaci* exposed to *S.*  
61 *habrochaites* as non-host plant was found to be associated with the emission of  
62 7-epizingiberene and R-curcumene compounds (Bleeker et al., 2009). This two  
63 terpene volatiles have shown strong repellency against *B. tabaci* and induced *S.*  
64 *habrochaites* to develop enhanced resistance to insect infestation (Freitas et al., 2002;  
65 Muigai et al., 2002). On the other hand, *B. tabaci* did not elicit behavioral responses  
66 to the two corresponding chiral isomers:  $\alpha$ -zingiberene and S-curcumene extracted  
67 from ginger (Bleeker et al., 2011). Transformation of cultivated tomato with the gene  
68 encoding *S. habrochaites* 7-epizingiberene synthase has become strongly repellent to  
69 *B. tabaci* that reduced whitefly fecundity up to 87% (Bleeker et al., 2012). These  
70 studies showed that *S. habrochaites* can exert strong repellent and toxic stresses

71 aganist *B. tabaci*, but it is unclear how it exerts its effects on the physiological and  
72 molecular levels.

73 In order to achieve the goal, it was necessary to study the expression-related genes  
74 that may be affected in the whitefly *B. tabaci* after exposure to the wild tomato  
75 relative *S. habrochaites*.

## 76 **2. Materials and methods**

### 77 **2.1 Insects rearing and plant materials**

78 The MED cryptic species of whitefly was reared on tomato plants (Xianke 8) under  
79 greenhouse conditions of  $25 \pm 2$  °C,  $65 \pm 5\%$  relative humidity (RH), and a 16:8 h  
80 (L:D) photoperiod. The tomato plant was placed into cage measuring (60 cm × 60 cm  
81 × 60 cm). The source of MED was collected from a greenhouse located in Beijing,  
82 China and identified as MED by mitochondrial cytochrome oxidase I (mtCOI) gene  
83 (Brown et al., 2005). One pair of newly emerged adults was used for colony initiation,  
84 and the MED source after six generations was used for subsequent experiments.

### 85 **2.2 Identification of wild tomato volatiles**

86 *S. habrochaites* were placed into the cages measuring (60 cm × 60 cm × 60 cm) and  
87 grown under greenhouse conditions of  $25 \pm 2$ °C,  $65 \pm 5\%$  RH, and a 16:8 h (L:D)  
88 photoperiod. Six-week-old plants were used for volatile analysis. We placed leaves of  
89 a healthy tomato plant into a glass bottle (45 mL, cleman) and an SPME fiber  
90 50/30- $\mu$ m divinylbenzene/carboxen/polydimethylsiloxane (Supelco; Sigma-Aldrich,  
91 <http://www.sigmaaldrich.com>) was used for analyte extraction. GC-MS analysis was  
92 performed on an Agilent 7890 (Agilent Technologies, Tustin, CA, USA) gas

93 chromatography and Agilent 5975 mass selective detector.. Samples were separated  
94 using both HP-5 and DB-WAX (both 30 m × 0.25 mm i.d., 0.25 mm film thickness,  
95 Agilent Technologies, Tustin, CA, USA). Helium was used as carrier gas at a flow  
96 rate of 1.7 mL/min, and the GC inlet was set in the split-less mode. The injector  
97 temperature was 220 °C. The optimization of method parameters of SPME and  
98 GC-MS were performed following to the method previously described (Li et al.,  
99 2018). R-curcumene has been identified using GC-MS techniques by comparing its  
100 retention time and mass spectrum with the same parameters from a reference  
101 compound. As the 7-epizingiberene is thermally unstable (Bleeker et al., 2011),  
102 therefore, the R-curcumene was used for conducting the behavioral and olfactory  
103 studies. The synthesis of R-curcumene and S-curcumene was performed according to  
104 the method previously reportedS (Song et al., 2012). The synthesized compounds  
105 were confirmed by using various spectral technique like mass spectrometry and NMR  
106 detection. The  $\alpha$ -zingiberene was purchased from Sigma-Aldrich (St. Louis,  
107 MO, USA).

### 108 **2.3 RNA sequencing and bioinformatics analysis**

109 To evaluate the effect of *S. habrochaites* on whiteflies at the molecular level,  
110 RNA-sequencing was performed using MED females and males, which have been fed  
111 on tomato Xianke 8 and the wild tomato *S. habrochaites* LA2175 for 6 and 24 h,  
112 respectively. Sequencing libraries were constructed using strand-specific libraries.  
113 FastQC (Andrews et al., 2010) was used to assess the quality of the sequencing data  
114 while Fastp (Chen et al., 2018) was employed to remove adapters, contamination, and

115 duplicate sequences. The sequenced clean data were mapped to the MED whitefly  
116 genome v1.0 (Xie et al., 2017) using HISAT2 (Kim et al., 2019)  
117 <ftp://www.whiteflygenomics.org/pub/whitefly/MED/v1.0>. FeatureCounts (Liao et al.,  
118 2014) was used to calculate the expression of each gene, edgeR (Robinson et al., 2010)  
119 was used to analyze the difference in gene expression (we used Log2 Fold Change>1,  
120 Adjusted P-value=0.05 as the threshold), rMATS (Shen et al., 2014) was used to  
121 analyze the alternative splicing, and Sashimi plot was used to draw the alternative  
122 splicing of genes. Finally, WGCNA (Langfelder and Horvath, 2008) was used to  
123 calculate the correlation between the gene expression level (TPM values) and the  
124 mortality phenotypes of whitefly.

### 125 **3. Results and discussion**

#### 126 **3.1 7-epizingiberene and R-curcumene are the main volatile components of *S.*** 127 ***habrochaites***

128 We synthesized a high-purity R-curcumene and confirmed its identity by mass  
129 spectrometry and NMR (Supplementary Data 1). We found that 7-epizingiberene and  
130 R-curcumene are the main volatile compounds of *S. habrochaites* using SPME and  
131 GC-MS detection. GC-MS analysis revealed that these two volatile compounds were  
132 not detected in the volatile blends of common tomato plants (Fig. 1). It was also found  
133 that the peak areas ratio of 7-epizingiberene and R-curcumene in LA2175 was 2.37-  
134 and 4.27-fold that of LA2329, respectively (Fig. 1). The data showed that LA2175  
135 leaves had a relatively higher content of terpene volatiles than LA2329. This is  
136 consistent with the biological analysis showing that LA2175 was more resistance to

137 whiteflies. Therefore, we chose and employed LA2175 for subsequent whitefly  
138 high-throughput sequencing studies.

### 139 **3.2 Expression of whitefly-related genes after stress exposure of *S. habrochaites***

140 A total of 24 samples of male and female whitefly adults (including two time points  
141 and four treatments) were used for transcriptome sequencing (Fig. 2). About 21–24  
142 million reads with an average length of 151 bp were aligned to the MED whitefly  
143 reference genome by HISAT2 (Table 1). About 78% of the reads mapped to unique  
144 loci (Table 1). After gene expression value analysis by featurecount and edgeR, we  
145 found four significantly upregulated genes in wild tomato 6-h-treated female adults  
146 (WF6) and wild tomato 24-h-treated female adults (WF24) (Fig. 2; Supplementary  
147 Data 2). They were BTA016109 (Multicopper oxidase), BTA027707  
148 (Sulfotransferase), BTA001651 (OHCU decarboxylase), and BTA011604 (Heat shock  
149 protein). Wild tomato 6-h-treated male adults (WM6) and wild tomato 24-h-treated  
150 female adults (WM24) also included four genes that are both significantly upregulated  
151 (Fig. 2; Supplementary Data 2). They were BTA003886 (Heat shock protein),  
152 BTA016667 (Unknown), BTA005900 (serine threonine-protein kinase SBK1-like),  
153 and BTA011604 (Heat shock protein). One gene (BTA011604, Heat shock protein)  
154 was significantly upregulated together in these four treatments. There were two genes  
155 that were significantly downregulated in WF6 and WF24, BTA009028 (Unknown)  
156 and BTA013802 (Farnesyl-diphosphate farnesyltransferase). Eighteen genes were  
157 significantly downregulated in WM6 and WM24 (Fig. 2; Supplementary Data 2).  
158 Among these, BTA022129 is solute carrier family 3, member 1, and the other genes

159 had unknown functions. These results indicated that the *S. habrochaites* treatment can  
160 induce the expression of environmental stress genes such as heat shock protein in  
161 whiteflies.

162 Alternative splicing is often related to the response of the organism to a stressful  
163 environment (Sultan et al., 2008; Ling et al., 2015; Wang et al., 2008). We determined  
164 if whiteflies were stressed by exposure to *S. habrochaites* and whether genes were  
165 able to respond to the stress through alternative splicing. We performed alternative  
166 splicing analysis on differently treated samples (comparison of male and female  
167 samples treated with *S. habrochaites* and then treated with common tomato) through  
168 rmats. There were five types of alternative splicing, including skipped exon (SE),  
169 mutually exclusive exon (MXE), alternative to 5'splice site (A5SS), alternative to 3'  
170 splice site (A3SS), and retained intron (RI). Among these, only SE and MXE had  
171 significant differences between the two treatments (FDR <0.05), and the SE type  
172 accounted for the main proportion (Table 2; Supplementary Data 3). GO enrichment  
173 analysis showed that genes with alternative splicing of the SE type were significantly  
174 enriched in three GO items including O-acetyltransferase activity, glycerol ether  
175 metabolic process , and ether metabolic process (Supplementary Data 4). The  
176 MXE-type alternative splicing genes were not significantly enriched.

### 177 **Data availability conflict of interest**

178 RNA-seq data have been deposited and are available in NCBI (BioProject ID is  
179 PRJNA622388).

180 **Conflict of interest:** The authors declare no conflict of interest.



## References

- Andrews, S., FastQC: a quality control tool for high throughput sequence data. Babraham Bioinformatics, Babraham Institute, Cambridge, United Kingdom, 2010.
- Bleeker, P. M., et al., 2009. The role of specific tomato volatiles in tomato-whitefly interaction. *Plant Physiology*. 151, 925-935.
- Bleeker, P. M., et al., 2011. Tomato-produced 7-epizingiberene and R-curcumene act as repellents to whiteflies. *Phytochemistry*. 72, 68-73.
- Bleeker, P. M., et al., 2012. Improved herbivore resistance in cultivated tomato with the sesquiterpene biosynthetic pathway from a wild relative. *Proceedings of the National Academy of Sciences*. 109, 20124-20129.
- Chen, S., et al., 2018. fastp: an ultra-fast all-in-one FASTQ preprocessor. *Bioinformatics*. 34, i884-i890.
- Chu, D., et al., 2006. The introduction of the exotic Q biotype of *Bemisia tabaci* from the Mediterranean region into China on ornamental crops. *Florida Entomologist*. 168-174.
- De Barro, P., Driver, F., 1997. Use of RAPD PCR to distinguish the B biotype from other biotypes of *Bemisia tabaci* (Gennadius)(Hemiptera: Aleyrodidae). *Australian Journal of Entomology*. 36, 149-152.
- Elbert, A., Nauen, R., 2000. Resistance of *Bemisia tabaci* (Homoptera: Aleyrodidae) to insecticides in southern Spain with special reference to neonicotinoids. *Pest Management* 56.
- Erdogan, C., et al., 2008. Insecticide resistance and biotype status of populations of the tobacco whitefly *Bemisia tabaci* (Hemiptera: Aleyrodidae) from Turkey. *Crop Protection*. 27, 600-605.
- Freitas, J. A., et al., 2002. Inheritance of foliar zingiberene contents and their relationship to trichome densities and whitefly resistance in tomatoes. *Euphytica*. 127, 275-287.
- Hu, J., et al., 2011. An extensive field survey combined with a phylogenetic analysis reveals rapid and widespread invasion of two alien whiteflies in China. *PloS one*. 6.
- Ingham, V. A., et al., 2020. A sensory appendage protein protects malaria vectors from pyrethroids. *Nature*. 577, 1-5.
- Kim, D., et al., 2019. Graph-based genome alignment and genotyping with HISAT2 and HISAT-genotype. *Nature biotechnology*. 37, 907-915.
- Langfelder, P., Horvath, S., 2008. WGCNA: an R package for weighted correlation network analysis. *BMC bioinformatics*. 9, 559.
- Leal, Walter, S., 2013. Odorant Reception in Insects: Roles of Receptors, Binding Proteins, and Degrading Enzymes. *Annual Review of Entomology*. 58, 373-391.
- Liao, Y., et al., 2014. featureCounts: an efficient general purpose program for assigning sequence reads to genomic features. *Bioinformatics*. 30, 923-930.
- Ling, Z., et al., 2015. Insect herbivory elicits genome-wide alternative splicing responses in *Nicotiana attenuata*. *The Plant Journal*. 84, 228-243.
- Muigai, S., et al., 2002. Mechanisms of resistance in *Lycopersicon* germplasm to the whitefly *Bemisia argentifolii*. *Phytoparasitica*. 30, 347.
- Pelosi, P., et al., 2017. Beyond chemoreception: Diverse tasks of soluble olfactory proteins in insects. *Biological Reviews of the Cambridge Philosophical Society*. 93.

- Robinson, M. D., et al., 2010. edgeR: a Bioconductor package for differential expression analysis of digital gene expression data. *Bioinformatics*. 26, 139-140.
- Shen, S., et al., 2014. rMATS: robust and flexible detection of differential alternative splicing from replicate RNA-Seq data. *Proceedings of the National Academy of Sciences*. 111, E5593-E5601.
- Song, S., et al., 2012. Enantioselective iridium-catalyzed hydrogenation of  $\beta$ ,  $\gamma$ -unsaturated carboxylic acids: An efficient approach to chiral 4-alkyl-4-aryl butanoic acids. *Angewandte Chemie International Edition*. 51, 2708-2711.
- Su, Q., et al., 2016. Tomato yellow leaf curl virus differentially influences plant defence responses to a vector and a non-vector herbivore. *Plant, cell & environment*. 39, 597-607.
- Suh, E., et al., 2014. Peripheral olfactory signaling in insects. *Curr Opin Insect Sci*. 6, 86-92.
- Sultan, M., et al., 2008. A global view of gene activity and alternative splicing by deep sequencing of the human transcriptome. *Science*. 321, 956-960.
- Wang, E. T., et al., 2008. Alternative isoform regulation in human tissue transcriptomes. *Nature*. 456, 470-476.
- Wei, J., et al., 2017. Vector development and vitellogenin determine the transovarial transmission of begomoviruses. *Proceedings of the National Academy of Sciences*. 114, 6746-6751.
- Xie, W., et al., 2017. Genome sequencing of the sweetpotato whitefly *Bemisia tabaci* MED/Q. *GigaScience*. 6, gix018.

## Figure legends

Fig.1: GC-MS analysis of the volatile profiles of wild tomato *Solanum habrochaites* LA2175, LA2329, and common tomato Xianke 8. 1. R-curcumene, 2. 7-epizingiberene, 3. *p*-cymene, 4.  $\beta$ -phellandrene, 5. elemene, 6.  $\alpha$ -copaene, 7. unknow, 8.  $\beta$ -caryophyllene, 9.  $\alpha$ -humulene.

Fig.2: Analysis of the RNA-Seq data of whiteflies treated by common tomato and wild tomato. (A) Principal component analysis (PCA) plot showing clustering of RNA-Seq of whiteflies. (B) Bar graph showing the number of upregulated (upper bars) and downregulated (lower bars) genes in whitefly male and female adults. (C) Venn diagram showing the number of induced differently expressed genes unique to or common within the four conditions. (D) Venn diagram showing the number of suppressed differently expressed genes unique to or common within the four conditions. WF6: wild tomato (*Solanum habrochaites*) 6 hours treated female adults; WM6: wild tomato 6 hours treated male adults; WF24: wild tomato 24 hours treated female adults; WM24: wild tomato 24 hours treated male adults.

Fig.1

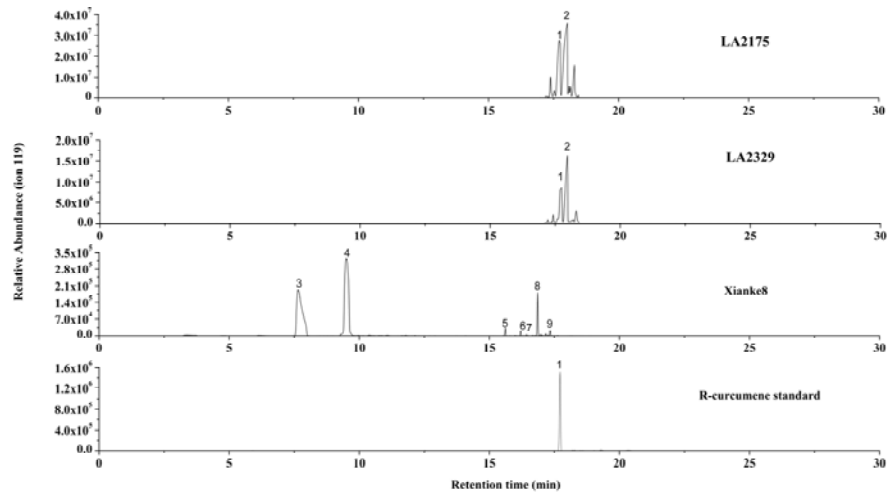

Fig.2

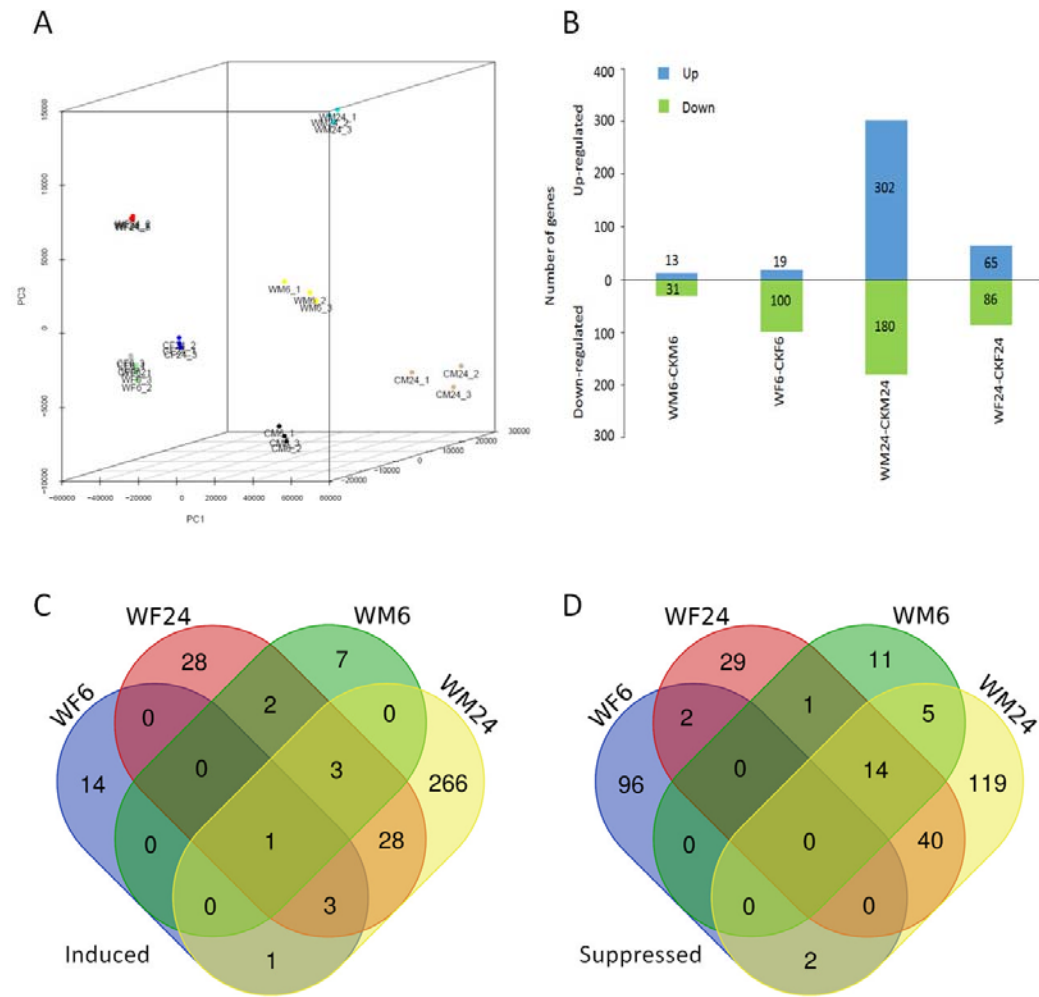

## Table legends

Table 1. Summary of the RNA-Seq Data. CKF6\_1-3, whitefly females grown on common tomato for 6 h replicates 1–3. CKM6\_1-3, whitefly males grown on common tomato for 6 h replicates 1–3. CKF24\_1-3, whitefly females grown on common tomato for 24 h replicates 1–3. CKM24\_1-3, whitefly males grown on common tomato for 24 h replicates 1–3. WF6\_1-3, whitefly females grown on wild tomato LA2175 for 6 h replicates 1–3. WM6\_1-3, whitefly males grown on wild tomato LA2175 for 6 h replicates 1–3. WF24\_1-3, whitefly females grown on wild tomato LA2175 for 24 h replicates 1–3. WM24\_1-3, whitefly males grown on wild tomato LA2175 for 24 h replicates 1–3.

Table 2. Genome-wide effects of *Solanum habrochaites* stress on alternative splicing of whitefly. WF6: wild tomato (*Solanum habrochaites*) 6-h-treated female adults; WM6: wild tomato 6-h-treated male adults; WF24: wild tomato 24-h-treated female adults; WM24: wild tomato 24-h-treated male adults. CKF6: common tomato 6-h-treated female adults; CKM6: common tomato 6-h-treated male adults; CKF24: common tomato 24-h-treated female adults; CKM24: common tomato 24-h-treated male adults.

Table 1

|         | No. of paired-end reads | No. of mapped paired-end reads | Proportion of mapped paired-end reads |
|---------|-------------------------|--------------------------------|---------------------------------------|
| CKF6_1  | 22729871                | 19170373                       | 84.34%                                |
| CKF6_2  | 24263436                | 20446798                       | 84.27%                                |
| CKF6_3  | 24587112                | 20852330                       | 84.81%                                |
| CKM6_1  | 22886414                | 18199276                       | 79.52%                                |
| CKM6_2  | 22949620                | 18146265                       | 79.07%                                |
| CKM6_3  | 22716792                | 18100740                       | 79.68%                                |
| CKF24_1 | 22159172                | 18759955                       | 84.66%                                |
| CKF24_2 | 22190660                | 18620183                       | 83.91%                                |
| CKF24_3 | 23055250                | 19278800                       | 83.62%                                |
| CKM24_1 | 22912092                | 18384663                       | 80.24%                                |
| CKM24_2 | 22576192                | 17744887                       | 78.60%                                |
| CKM24_3 | 22106168                | 17342289                       | 78.45%                                |
| WF6_1   | 21695473                | 17994225                       | 82.94%                                |
| WF6_2   | 25184704                | 21089671                       | 83.74%                                |
| WF6_3   | 24590350                | 20636222                       | 83.92%                                |
| WM6_1   | 23754024                | 19112488                       | 80.46%                                |
| WM6_2   | 24277496                | 19358875                       | 79.74%                                |
| WM6_3   | 22011538                | 17624639                       | 80.07%                                |
| WF24_1  | 22934225                | 19340432                       | 84.33%                                |
| WF24_2  | 22669251                | 18994565                       | 83.79%                                |
| WF24_3  | 24285715                | 20487429                       | 84.36%                                |
| WM24_1  | 23292401                | 19060172                       | 81.83%                                |
| WM24_2  | 21426439                | 17460405                       | 81.49%                                |
| WM24_3  | 24205186                | 19790160                       | 81.76%                                |

Table2

| AS Events Summary | WF6 vs<br>CKF6 | WM6 vs<br>CKM6 | WF24 vs<br>CKF24 | WM24 vs<br>CKM24 |
|-------------------|----------------|----------------|------------------|------------------|
| SE                | 7              | 13             | 11               | 14               |
| MXE               | 0              | 1              | 2                | 5                |
| RI                | 0              | 0              | 0                | 0                |
| A5SS              | 0              | 0              | 0                | 0                |
| A3SS              | 0              | 0              | 0                | 0                |
